# Supplementary material for: Detection of protein–protein interactions at the septin collar in Saccharomyces cerevisiae using a tripartite split-GFP system
Source: PubMed Central journal article supplement — Mol Biol Cell. 2016 Sep 1;27(17):2708–25. doi: 10.1091/mbc.E16-05-0337 (PMC5007091; doi:10.1091/mbc.e16-05-0337), 2016-09-01
Supplement: supp_E16-05-0337v1_CombinedSupMats.pdf [file supp_E16-05-0337v1_CombinedSupMats.pdf]

# Supplemental Materials

*Molecular Biology of the Cell*

Finnigan et al.

**SUPPORTING INFORMATION**

for

**Detection of protein-protein interactions at the septin collar in *Saccharomyces cerevisiae*  
using a tripartite split-GFP system**

Gregory C. Finnigan,<sup>†</sup> Angela Duvalyan, Elizabeth N. Liao, Aspram Sargsyan  
and Jeremy Thorner\*

Division of Biochemistry, Biophysics and Structural Biology,  
Department of Molecular and Cell Biology,  
University of California, Berkeley, CA 94720-3202 USA

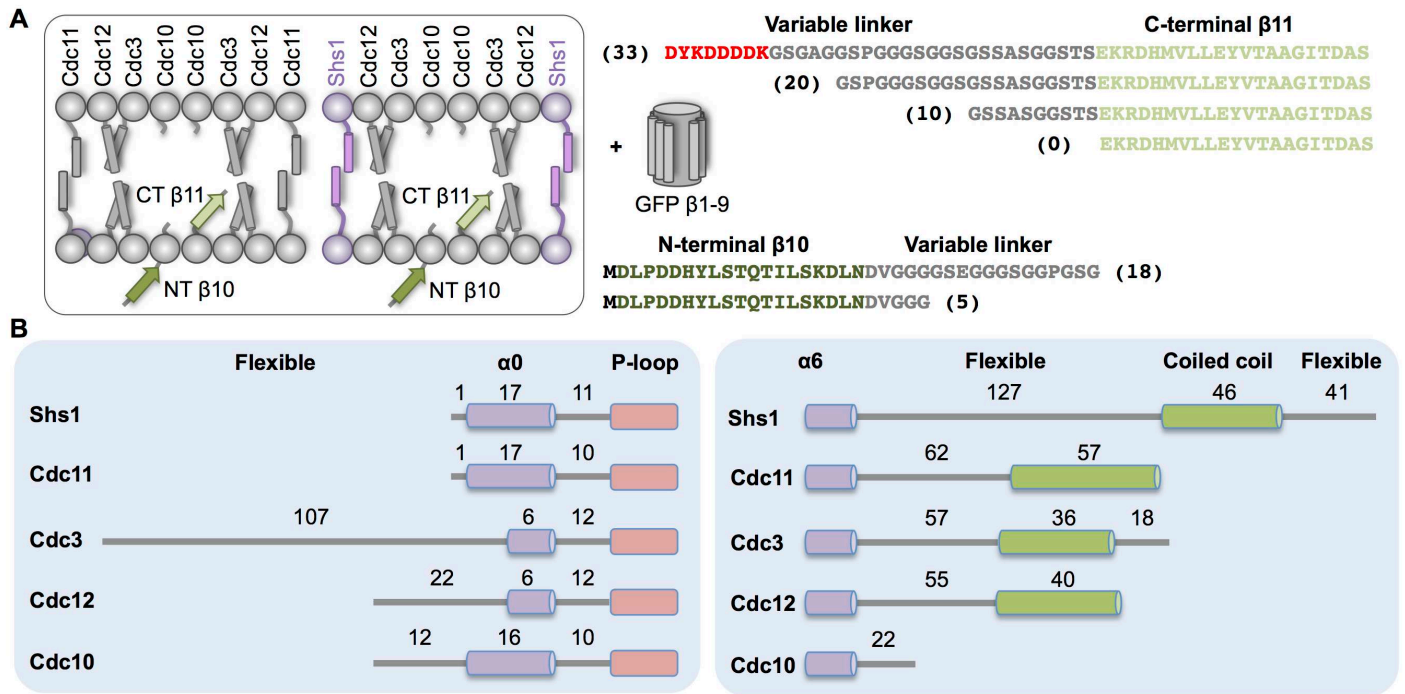

**Figure S1.** Tagging septin subunits for the tripartite split-GFP system. (A) *Left*, schematic diagram of the linear septin hetero-octamer, which can be capped with either of two alternative terminal subunits, Cdc11 or Shs1 (*purple*), and can polymerize end-to-end to form long laterally paired filaments. *Grey ball*, globular GTP-binding domain of each subunit; *cylinder*, C-terminal extension (CTE) with predicted  $\alpha$ -helical and coiled coil-forming propensity (which only Cdc10 lacks); *dark green*, introduced N-terminal  $\beta$ 10 tag; *light green*, introduced C-terminal  $\beta$ 11 tag. When tagged versions of the same subunit are present in the diploid (e.g.,  $\beta$ 10-Cdc10 and Cdc10- $\beta$ 11), no WT copy is present and 50% of the hetero-octamers will contain both tagged subunits. When two different tagged septins are combined (e.g.,  $\beta$ 10-Cdc10 x Cdc3- $\beta$ 11), there is also a WT copy of each subunit present, which is not depicted in the diagram for clarity. In the latter case, in this representative subunit-subunit pairing (e.g.,  $\beta$ 10-Cdc10 x Cdc3- $\beta$ 11), 7/16 (44%) of the hetero-octamers should contain both tagged subunits in a juxtaposed position. However, hetero-octamers are polymerized into filaments at the bud neck, greatly increasing the number of potential sites where juxtaposed tags will be present within any given septin collar, consequently the probability of detection (capture of the GFP $\beta$ 1-9 barrel at multiple locations at the bud neck) is greatly enhanced. *Right*, C-terminal  $\beta$ 11 tags were appended directly or with Ser- and Gly-rich linkers with the indicated lengths (10, 20 and 33 residues) and sequences indicated; N-terminal  $\beta$ 10 tags were tethered, in most cases, by Gly-rich linkers of the lengths (5 and 18 residues) and sequences indicated. (B) Schematic representation of the naturally-occurring N-terminal (*left*) and C-terminal (*right*) extensions in the five yeast mitotic septins. Structure features follow the nomenclature of Sirajuddin *et al.* (2007).

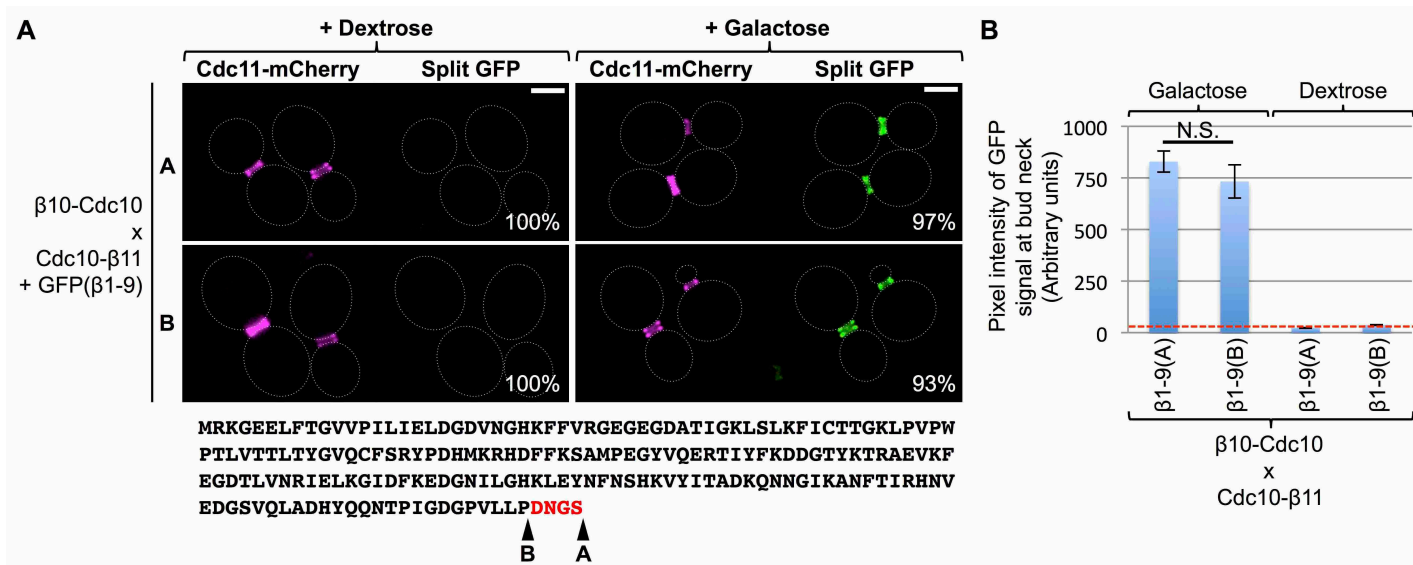

**Figure S2.** Both versions of the GFP $\beta$ 1-9 barrel display robust GFP reconstitution *in vivo*. (A) In the initial report describing the tripartite split-GFP system (Cabantous et al., 2013), constructs of the GFP $\beta$ 1-9 barrel that end at different positions after the 9<sup>th</sup> strand were used. Hence, we tested two such versions of GFP $\beta$ 1-9 in yeast *in vivo*: A, which includes four additional residues (DNGS; red); and, B, ending after VLLP. Diploids (1 and 9, respectively) expressing  $\beta$ 10-(linker)<sub>32</sub>-Cdc10 and Cdc10-(linker)<sub>33</sub>- $\beta$ 11, as well as Cdc11-mCherry, and carrying plasmids expressing either GFP $\beta$ 1-9(A) (pGF-IVL794) or GFP $\beta$ 1-9(B) (pGF-IVL795) from the inducible *GAL1/GAL10* promoter, were cultured overnight in 2% raffinose-0.2% sucrose medium selective for the presence of the plasmid, then back diluted into either the same medium containing 2% glucose (*left*) or 2% galactose (*right*), grown for 4.5 h, washed, and imaged by fluorescence microscopy. Glucose repression of either GFP $\beta$ 1-9(A) or GFP $\beta$ 1-9(B) expression prevented reconstitution of any GFP signal, whereas galactose induction of either GFP $\beta$ 1-9(A) or GFP $\beta$ 1-9(B) yielded equivalent, robust GFP fluorescence congruent with the bud neck marked with Cdc11-mCh. The percentage of the population (out of 50-100 representative budded cells) displaying the fluorescence pattern shown is indicated by the number in the lower right-hand corner of each panel. *Dotted white dotted line*, cell periphery; scale bar, 2  $\mu$ m. (B) Quantification of the average pixel intensity of the GFP signal at the bud neck for the cultures shown in (A). *Dotted red line*, the average intrinsic background fluorescence of the bud neck in yeast cells lacking the components of the tripartite split-GFP system; *error bar*, S.E.M. There was no statistically significant difference (unpaired t-test,  $p = 0.325$ ) between the average pixel intensity of the GFP signal at the bud neck when using either GFP $\beta$ 1-9(A) or GFP $\beta$ 1-9(B).

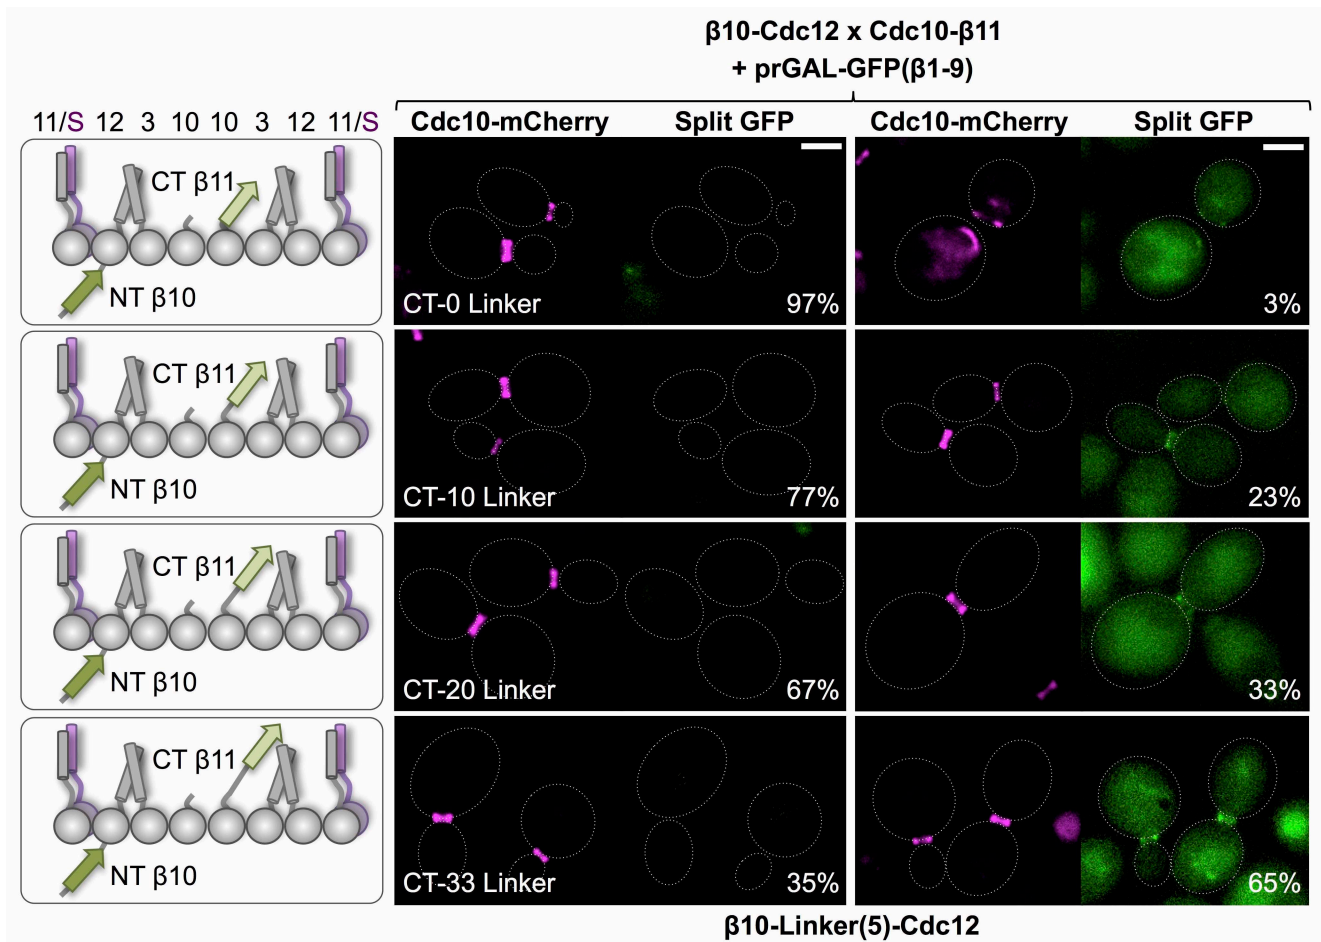

**Figure S3.** Interaction between Cdc10 and Cdc12 can be detected using the tripartite split-GFP method by extending the length of the linkers that tether the  $\beta$ 10 and  $\beta$ 11 tags. *Left*, schematic diagram of the septin hetero-octamer with the relative placement of the  $\beta$ 10 and  $\beta$ 11 tags on Cdc10 and Cdc12 (not precisely to scale). *Right*, Diploids (27, 13, 20, and 34) expressing  $\beta$ 10-(linker)<sub>5</sub>-Cdc12 (constant) with, respectively, Cdc10- $\beta$ 11, Cdc10-(linker)<sub>10</sub>- $\beta$ 11, Cdc10-(linker)<sub>20</sub>- $\beta$ 11, or Cdc10-(linker)<sub>33</sub>- $\beta$ 11, as indicated, as well as Cdc10-mCh and a *CEN* plasmid expressing the GFP $\beta$ 1-9 barrel from the *GAL1/GAL10* promoter (pGF-IVL794), were cultured, induce with galactose, harvested, washed and imaged by fluorescence microscopy as in Fig. S2A. The percentage of the population (out of 50-100 representative budded cells) displaying the fluorescence pattern shown is indicated by the number in the lower right-hand corner of each panel.

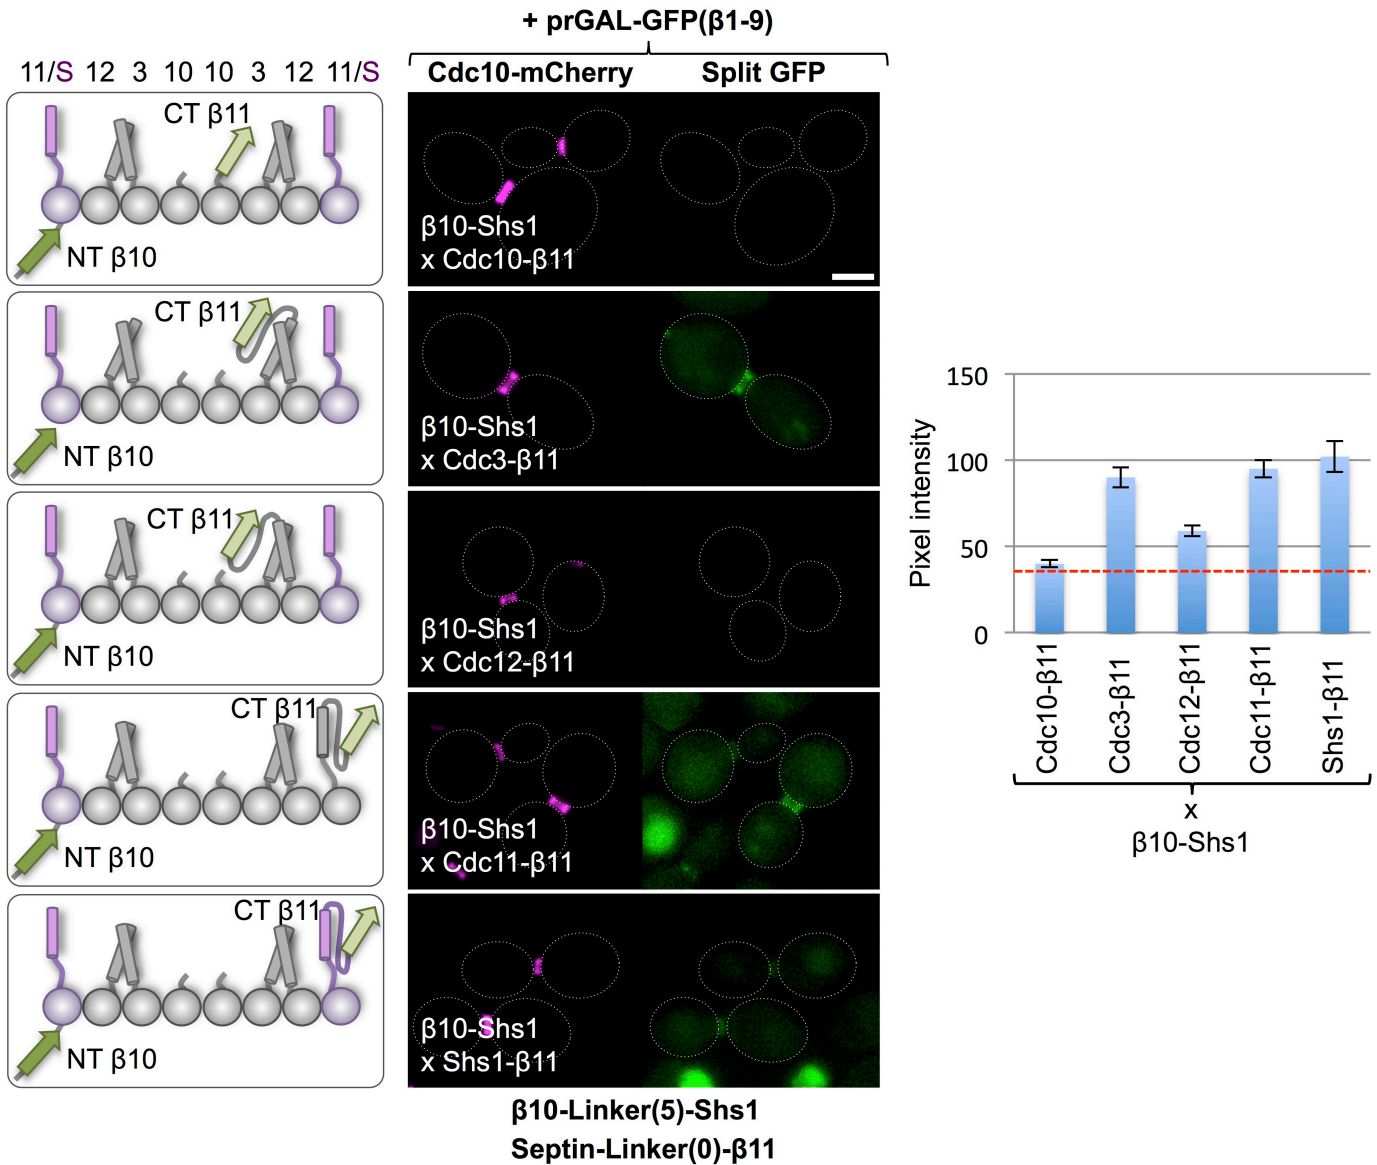

**Figure S4.** Interaction of the non-essential subunit Shs1 with the other mitotic septins assessed using the tripartite split-GFP method. (A) Diploids (108-112) expressing  $\beta$ 10-(linker)<sub>5</sub>-Shs1 and versions of all five mitotic septins to which the C-terminal  $\beta$ 11 tag had been directly appended (i.e., no linker), and Cdc10-mCh (*left*), as well as the GFP $\beta$ 1-9 barrel under the control of the *GAL1/GAL10* promoter on a *CEN* plasmid (pGF-IVL794) (*not shown*), were cultured, induced, harvested, washed and imaged by fluorescence microscopy as in Fig. S2A (*middle*). As always, the same exposure time was used for image capture and the images were scaled identically. *Dotted white lines*, cell periphery; scale bar, 2  $\mu$ m. *Right*, quantification using Image J of the average pixel intensity of the GFP signal at the bud neck (25-50 budded cells) for the cultures shown (*middle*). *Dotted red line*, the average intrinsic background fluorescence of the bud neck in yeast cells lacking the components of the tripartite split-GFP system; *error bar*, S.E.M

Table S1. Yeast strains used in Supplemental Figures 1-4.

| Strain   | Genotype                                                                                                            | Reference                |
|----------|---------------------------------------------------------------------------------------------------------------------|--------------------------|
| BY4741   | <i>MATa leu2Δ ura3Δ met15Δ his3Δ</i>                                                                                | (Brachmann et al., 1998) |
| BY4742   | <i>MATα leu2Δ ura3Δ met15Δ his3Δ</i>                                                                                | (Brachmann et al., 1998) |
| GFY-1794 | BY4742; <i>cdc10Δ::GFPβ10::Linker(32)::CDC10::ADH1(t)::Hyg<sup>R</sup></i><br><i>cdc11Δ::CDC11::mCherry::SpHIS5</i> | This study               |
| GFY-1570 | BY4741; <i>cdc10Δ::CDC10::Linker(33)::GFPβ11::ADH1(t)::Nat<sup>R</sup></i>                                          | This study               |
| GFY-1803 | BY4742; <i>cdc12Δ::GFPβ10::Linker(5)::CDC12::ADH1(t)::Hyg<sup>R</sup></i><br><i>cdc10Δ::CDC10::mCherry::SpHIS5</i>  | This study               |
| GFY-1851 | BY4741; <i>cdc10Δ::CDC10::GFPβ11::ADH1(t)::Hyg<sup>R</sup></i>                                                      | This study               |
| GFY-1852 | BY4741; <i>cdc10Δ::CDC10::Linker(10)::GFPβ11::ADH1(t)::Hyg<sup>R</sup></i>                                          | This study               |
| GFY-1853 | BY4741; <i>cdc10Δ::CDC10::Linker(20)::GFPβ11::ADH1(t)::Hyg<sup>R</sup></i>                                          | This study               |
| GFY-1807 | BY4742; <i>shs1Δ::GFPβ10::Linker(5)::SHS1::ADH1(t)::Hyg<sup>R</sup></i><br><i>cdc10Δ::CDC10::mCherry::SpHIS5</i>    | This study               |
| GFY-1845 | BY4741; <i>cdc3Δ::CDC3::GFPβ11::ADH1(t)::Hyg<sup>R</sup></i>                                                        | This study               |
| GFY-1848 | BY4741; <i>cdc12Δ::CDC12::GFPβ11::ADH1(t)::Hyg<sup>R</sup></i>                                                      | This study               |
| GFY-1842 | BY4741; <i>cdc11Δ::CDC11::GFPβ11::ADH1(t)::Hyg<sup>R</sup></i>                                                      | This study               |
| GFY-1839 | BY4741; <i>shs1Δ::SHS1::GFPβ11::ADH1(t)::Hyg<sup>R</sup></i>                                                        | This study               |

Table S2. Plasmids used in Supplemental Figures 1-4.

|            |                                                                                 |                             |
|------------|---------------------------------------------------------------------------------|-----------------------------|
| pRS315     | CEN; <i>LEU2 AMP</i>                                                            | (Sikorski and Hieter, 1989) |
| pGF-IVL794 | pRS315; <i>prGAL1/10::GFP<math>\beta</math>1-9(A)::ADH1(t)::Kan<sup>R</sup></i> | This study                  |
| pGF-IVL795 | pRS315; <i>prGAL1/10::GFP<math>\beta</math>1-9(B)::ADH1(t)::Kan<sup>R</sup></i> | This study                  |



Table S3. Diploid strains used in this study.

| <b>Diploid Number</b> | <b>Haploid strains crossed (+ plamids)</b> | <b>Notes<sup>2</sup></b>           |
|-----------------------|--------------------------------------------|------------------------------------|
| 1 <sup>1</sup>        | GFY-1794 x GFY-1570 (+pGF-IVL794)          | Negative Controls                  |
| 2                     | GFY-1794 x BY4741 (+pGF-IVL794)            | Negative Controls                  |
| 3                     | GFY-59 x GFY-1570 (+pGF-IVL794)            | Negative Controls                  |
| 4                     | GFY-59 x BY4741 (+pGF-IVL794)              | Negative Controls                  |
| 5                     | GFY-59 x BY4741 (+pRS315 empty)            | Negative Controls                  |
| 6                     | GFY-1794 x GFY-1570 (+pRS315 empty)        | Negative Controls                  |
| 7                     | GFY-59 x GFY-1570 (+pRS315 empty)          | Negative Controls                  |
| 8                     | GFY-1794 x BY4741 (+pRS315 empty)          | Negative Controls                  |
| 9                     | GFY-1794 x GFY-1570 (+pGF-IVL795)          | Negative Controls                  |
|                       |                                            |                                    |
| 164                   | GFY-1793 x GFY-1979 (+pGF-IVL794)          | Neg. Controls (P <sub>gk1</sub> )  |
| 165                   | GFY-1796 x GFY-1979 (+pGF-IVL794)          | Neg. Controls (P <sub>gk1</sub> )  |
| 166                   | GFY-1795 x GFY-1979 (+pGF-IVL794)          | Neg. Controls (P <sub>gk1</sub> )  |
| 167                   | GFY-1797 x GFY-1979 (+pGF-IVL794)          | Neg. Controls (P <sub>gk1</sub> )  |
| 168                   | GFY-1806 x GFY-1979 (+pGF-IVL794)          | Neg. Controls (P <sub>gk1</sub> )  |
|                       |                                            |                                    |
| 170                   | GFY-1793 x GFY-1983 (+pGF-IVL794)          | Neg. Controls (H <sub>sp82</sub> ) |
| 171                   | GFY-1796 x GFY-1983 (+pGF-IVL794)          | Neg. Controls (H <sub>sp82</sub> ) |
| 172                   | GFY-1795 x GFY-1983 (+pGF-IVL794)          | Neg. Controls (H <sub>sp82</sub> ) |
| 173                   | GFY-1797 x GFY-1983 (+pGF-IVL794)          | Neg. Controls (H <sub>sp82</sub> ) |
| 174                   | GFY-1806 x GFY-1983 (+pGF-IVL794)          | Neg. Controls (H <sub>sp82</sub> ) |
|                       |                                            |                                    |

|     |                                   |                                     |
|-----|-----------------------------------|-------------------------------------|
| 272 | GFY-1793 x GFY-2035 (+pGF-IVL794) | Neg. Controls (Cdc19)               |
| 273 | GFY-1796 x GFY-2035 (+pGF-IVL794) | Neg. Controls (Cdc19)               |
| 274 | GFY-1795 x GFY-2035 (+pGF-IVL794) | Neg. Controls (Cdc19)               |
| 275 | GFY-1797 x GFY-2035 (+pGF-IVL794) | Neg. Controls (Cdc19)               |
| 276 | GFY-1806 x GFY-2035 (+pGF-IVL794) | Neg. Controls (Cdc19)               |
|     |                                   |                                     |
| 277 | GFY-1793 x GFY-2036 (+pGF-IVL794) | Neg. Controls (Gpp1)                |
| 278 | GFY-1796 x GFY-2036 (+pGF-IVL794) | Neg. Controls (Gpp1)                |
| 279 | GFY-1795 x GFY-2036 (+pGF-IVL794) | Neg. Controls (Gpp1)                |
| 280 | GFY-1797 x GFY-2036 (+pGF-IVL794) | Neg. Controls (Gpp1)                |
| 281 | GFY-1806 x GFY-2036 (+pGF-IVL794) | Neg. Controls (Gpp1)                |
|     |                                   |                                     |
| 282 | GFY-1793 x GFY-2043 (+pGF-IVL794) | Neg. Controls (Tpi1)                |
| 283 | GFY-1796 x GFY-2043 (+pGF-IVL794) | Neg. Controls (Tpi1)                |
| 284 | GFY-1795 x GFY-2043 (+pGF-IVL794) | Neg. Controls (Tpi1)                |
| 285 | GFY-1797 x GFY-2043 (+pGF-IVL794) | Neg. Controls (Tpi1)                |
| 286 | GFY-1806 x GFY-2043 (+pGF-IVL794) | Neg. Controls (Tpi1)                |
|     |                                   |                                     |
| 25  | GFY-1801 x GFY-1851 (+pGF-IVL794) | Septin x Septin (Cdc10- $\beta$ 11) |
| 24  | GFY-1798 x GFY-1851 (+pGF-IVL794) | Septin x Septin (Cdc10- $\beta$ 11) |
| 27  | GFY-1803 x GFY-1851 (+pGF-IVL794) | Septin x Septin (Cdc10- $\beta$ 11) |
| 26  | GFY-1804 x GFY-1851 (+pGF-IVL794) | Septin x Septin (Cdc10- $\beta$ 11) |
| 28  | GFY-1807 x GFY-1851 (+pGF-IVL794) | Septin x Septin (Cdc10- $\beta$ 11) |
|     |                                   |                                     |
| 39  | GFY-1796 x GFY-1851 (+pGF-IVL794) | Septin x Septin (Cdc10- $\beta$ 11) |

|    |                                   |                             |
|----|-----------------------------------|-----------------------------|
| 38 | GFY-1793 x GFY-1851 (+pGF-IVL794) | Septin x Septin (Cdc10-β11) |
| 41 | GFY-1797 x GFY-1851 (+pGF-IVL794) | Septin x Septin (Cdc10-β11) |
| 40 | GFY-1795 x GFY-1851 (+pGF-IVL794) | Septin x Septin (Cdc10-β11) |
| 42 | GFY-1806 x GFY-1851 (+pGF-IVL794) | Septin x Septin (Cdc10-β11) |
|    |                                   |                             |
| 11 | GFY-1801 x GFY-1852 (+pGF-IVL794) | Septin x Septin (Cdc10-β11) |
| 10 | GFY-1798 x GFY-1852 (+pGF-IVL794) | Septin x Septin (Cdc10-β11) |
| 13 | GFY-1803 x GFY-1852 (+pGF-IVL794) | Septin x Septin (Cdc10-β11) |
| 12 | GFY-1804 x GFY-1852 (+pGF-IVL794) | Septin x Septin (Cdc10-β11) |
| 14 | GFY-1807 x GFY-1852 (+pGF-IVL794) | Septin x Septin (Cdc10-β11) |
|    |                                   |                             |
| 46 | GFY-1796 x GFY-1852 (+pGF-IVL794) | Septin x Septin (Cdc10-β11) |
| 45 | GFY-1793 x GFY-1852 (+pGF-IVL794) | Septin x Septin (Cdc10-β11) |
| 48 | GFY-1797 x GFY-1852 (+pGF-IVL794) | Septin x Septin (Cdc10-β11) |
| 47 | GFY-1795 x GFY-1852 (+pGF-IVL794) | Septin x Septin (Cdc10-β11) |
| 49 | GFY-1806 x GFY-1852 (+pGF-IVL794) | Septin x Septin (Cdc10-β11) |
|    |                                   |                             |
| 18 | GFY-1801 x GFY-1853 (+pGF-IVL794) | Septin x Septin (Cdc10-β11) |
| 17 | GFY-1798 x GFY-1853 (+pGF-IVL794) | Septin x Septin (Cdc10-β11) |
| 20 | GFY-1803 x GFY-1853 (+pGF-IVL794) | Septin x Septin (Cdc10-β11) |
| 19 | GFY-1804 x GFY-1853 (+pGF-IVL794) | Septin x Septin (Cdc10-β11) |
| 21 | GFY-1807 x GFY-1853 (+pGF-IVL794) | Septin x Septin (Cdc10-β11) |
|    |                                   |                             |
| 53 | GFY-1796 x GFY-1853 (+pGF-IVL794) | Septin x Septin (Cdc10-β11) |
| 52 | GFY-1793 x GFY-1853 (+pGF-IVL794) | Septin x Septin (Cdc10-β11) |

|    |                                   |                                     |
|----|-----------------------------------|-------------------------------------|
| 55 | GFY-1797 x GFY-1853 (+pGF-IVL794) | Septin x Septin (Cdc10- $\beta$ 11) |
| 54 | GFY-1795 x GFY-1853 (+pGF-IVL794) | Septin x Septin (Cdc10- $\beta$ 11) |
| 56 | GFY-1806 x GFY-1853 (+pGF-IVL794) | Septin x Septin (Cdc10- $\beta$ 11) |
|    |                                   |                                     |
| 32 | GFY-1801 x GFY-1570 (+pGF-IVL794) | Septin x Septin (Cdc10- $\beta$ 11) |
| 31 | GFY-1798 x GFY-1570 (+pGF-IVL794) | Septin x Septin (Cdc10- $\beta$ 11) |
| 34 | GFY-1803 x GFY-1570 (+pGF-IVL794) | Septin x Septin (Cdc10- $\beta$ 11) |
| 33 | GFY-1804 x GFY-1570 (+pGF-IVL794) | Septin x Septin (Cdc10- $\beta$ 11) |
| 35 | GFY-1807 x GFY-1570 (+pGF-IVL794) | Septin x Septin (Cdc10- $\beta$ 11) |
|    |                                   |                                     |
| 60 | GFY-1796 x GFY-1570 (+pGF-IVL794) | Septin x Septin (Cdc10- $\beta$ 11) |
| 59 | GFY-1793 x GFY-1570 (+pGF-IVL794) | Septin x Septin (Cdc10- $\beta$ 11) |
| 62 | GFY-1797 x GFY-1570 (+pGF-IVL794) | Septin x Septin (Cdc10- $\beta$ 11) |
| 61 | GFY-1795 x GFY-1570 (+pGF-IVL794) | Septin x Septin (Cdc10- $\beta$ 11) |
| 63 | GFY-1806 x GFY-1570 (+pGF-IVL794) | Septin x Septin (Cdc10- $\beta$ 11) |
|    |                                   |                                     |
| 67 | GFY-1798 x GFY-1851 (+pGF-IVL794) | Septin x Septin ( $\beta$ 10-Cdc3)  |
| 66 | GFY-1798 x GFY-1845 (+pGF-IVL794) | Septin x Septin ( $\beta$ 10-Cdc3)  |
| 69 | GFY-1798 x GFY-1848 (+pGF-IVL794) | Septin x Septin ( $\beta$ 10-Cdc3)  |
| 68 | GFY-1798 x GFY-1842 (+pGF-IVL794) | Septin x Septin ( $\beta$ 10-Cdc3)  |
| 70 | GFY-1798 x GFY-1839 (+pGF-IVL794) | Septin x Septin ( $\beta$ 10-Cdc3)  |
|    |                                   |                                     |
| 74 | GFY-1801 x GFY-1851 (+pGF-IVL794) | Septin x Septin ( $\beta$ 10-Cdc10) |
| 73 | GFY-1801 x GFY-1845 (+pGF-IVL794) | Septin x Septin ( $\beta$ 10-Cdc10) |
| 76 | GFY-1801 x GFY-1848 (+pGF-IVL794) | Septin x Septin ( $\beta$ 10-Cdc10) |

|     |                                   |                                     |
|-----|-----------------------------------|-------------------------------------|
| 75  | GFY-1801 x GFY-1842 (+pGF-IVL794) | Septin x Septin ( $\beta$ 10-Cdc10) |
| 77  | GFY-1801 x GFY-1839 (+pGF-IVL794) | Septin x Septin ( $\beta$ 10-Cdc10) |
|     |                                   |                                     |
| 81  | GFY-1804 x GFY-1851 (+pGF-IVL794) | Septin x Septin ( $\beta$ 10-Cdc11) |
| 80  | GFY-1804 x GFY-1845 (+pGF-IVL794) | Septin x Septin ( $\beta$ 10-Cdc11) |
| 83  | GFY-1804 x GFY-1848 (+pGF-IVL794) | Septin x Septin ( $\beta$ 10-Cdc11) |
| 82  | GFY-1804 x GFY-1842 (+pGF-IVL794) | Septin x Septin ( $\beta$ 10-Cdc11) |
| 84  | GFY-1804 x GFY-1839 (+pGF-IVL794) | Septin x Septin ( $\beta$ 10-Cdc11) |
|     |                                   |                                     |
| 109 | GFY-1807 x GFY-1851 (+pGF-IVL794) | Septin x Septin ( $\beta$ 10-Shs1)  |
| 108 | GFY-1807 x GFY-1845 (+pGF-IVL794) | Septin x Septin ( $\beta$ 10-Shs1)  |
| 111 | GFY-1807 x GFY-1848 (+pGF-IVL794) | Septin x Septin ( $\beta$ 10-Shs1)  |
| 110 | GFY-1807 x GFY-1842 (+pGF-IVL794) | Septin x Septin ( $\beta$ 10-Shs1)  |
| 112 | GFY-1807 x GFY-1839 (+pGF-IVL794) | Septin x Septin ( $\beta$ 10-Shs1)  |
|     |                                   |                                     |
| 102 | GFY-1803 x GFY-1851 (+pGF-IVL794) | Septin x Septin ( $\beta$ 10-Cdc12) |
| 101 | GFY-1803 x GFY-1845 (+pGF-IVL794) | Septin x Septin ( $\beta$ 10-Cdc12) |
| 104 | GFY-1803 x GFY-1848 (+pGF-IVL794) | Septin x Septin ( $\beta$ 10-Cdc12) |
| 103 | GFY-1803 x GFY-1842 (+pGF-IVL794) | Septin x Septin ( $\beta$ 10-Cdc12) |
| 105 | GFY-1803 x GFY-1839 (+pGF-IVL794) | Septin x Septin ( $\beta$ 10-Cdc12) |
|     |                                   |                                     |
| 151 | GFY-1809 x GFY-1570 (+pGF-IVL794) | Septin x $\beta$ 10-Bni5            |
| 150 | GFY-1809 x GFY-1572 (+pGF-IVL794) | Septin x $\beta$ 10-Bni5            |
| 153 | GFY-1809 x GFY-1571 (+pGF-IVL794) | Septin x $\beta$ 10-Bni5            |
| 152 | GFY-1809 x GFY-1573 (+pGF-IVL794) | Septin x $\beta$ 10-Bni5            |

|     |                                   |                                    |
|-----|-----------------------------------|------------------------------------|
| 154 | GFY-1809 x GFY-1567 (+pGF-IVL794) | Septin x $\beta$ 10-Bni5           |
| 155 | GFY-1809 x GFY-1735 (+pGF-IVL794) | Bni5- $\beta$ 11 x $\beta$ 10-Bni5 |
|     |                                   |                                    |
| 127 | GFY-1796 x GFY-1735 (+pGF-IVL794) | Septin x Bni5- $\beta$ 11          |
| 120 | GFY-1793 x GFY-1735 (+pGF-IVL794) | Septin x Bni5- $\beta$ 11          |
| 141 | GFY-1797 x GFY-1735 (+pGF-IVL794) | Septin x Bni5- $\beta$ 11          |
| 134 | GFY-1795 x GFY-1735 (+pGF-IVL794) | Septin x Bni5- $\beta$ 11          |
| 148 | GFY-1806 x GFY-1735 (+pGF-IVL794) | Septin x Bni5- $\beta$ 11          |
|     |                                   |                                    |
| 158 | GFY-1899 x GFY-1570 (+pGF-IVL794) | Septin x $\beta$ 10-Nis1           |
| 157 | GFY-1899 x GFY-1572 (+pGF-IVL794) | Septin x $\beta$ 10-Nis1           |
| 160 | GFY-1899 x GFY-1571 (+pGF-IVL794) | Septin x $\beta$ 10-Nis1           |
| 159 | GFY-1899 x GFY-1573 (+pGF-IVL794) | Septin x $\beta$ 10-Nis1           |
| 161 | GFY-1899 x GFY-1567 (+pGF-IVL794) | Septin x $\beta$ 10-Nis1           |
| 163 | GFY-1899 x GFY-1854 (+pGF-IVL794) | Nis1- $\beta$ 11 x $\beta$ 10-Nis1 |
|     |                                   |                                    |
| 128 | GFY-1796 x GFY-1854 (+pGF-IVL794) | Septin x Nis1- $\beta$ 11          |
| 121 | GFY-1793 x GFY-1854 (+pGF-IVL794) | Septin x Nis1- $\beta$ 11          |
| 142 | GFY-1797 x GFY-1854 (+pGF-IVL794) | Septin x Nis1- $\beta$ 11          |
| 135 | GFY-1795 x GFY-1854 (+pGF-IVL794) | Septin x Nis1- $\beta$ 11          |
| 149 | GFY-1806 x GFY-1854 (+pGF-IVL794) | Septin x Nis1- $\beta$ 11          |
|     |                                   |                                    |
| 177 | GFY-1992 x GFY-1570 (+pGF-IVL794) | Septin x Hsl1(WT)                  |
| 176 | GFY-1992 x GFY-1572 (+pGF-IVL794) | Septin x Hsl1(WT)                  |
| 179 | GFY-1992 x GFY-1571 (+pGF-IVL794) | Septin x Hsl1(WT)                  |

|     |                                   |                                   |
|-----|-----------------------------------|-----------------------------------|
| 178 | GFY-1992 x GFY-1573 (+pGF-IVL794) | Septin x Hsl1(WT)                 |
| 180 | GFY-1992 x GFY-1567 (+pGF-IVL794) | Septin x Hsl1(WT)                 |
|     |                                   |                                   |
| 182 | GFY-1995 x GFY-1570 (+pGF-IVL794) | Septin x Hsl1(611-950)            |
| 181 | GFY-1995 x GFY-1572 (+pGF-IVL794) | Septin x Hsl1(611-950)            |
| 184 | GFY-1995 x GFY-1571 (+pGF-IVL794) | Septin x Hsl1(611-950)            |
| 183 | GFY-1995 x GFY-1573 (+pGF-IVL794) | Septin x Hsl1(611-950)            |
| 185 | GFY-1995 x GFY-1567 (+pGF-IVL794) | Septin x Hsl1(611-950)            |
|     |                                   |                                   |
| 187 | GFY-1997 x GFY-1570 (+pGF-IVL794) | Septin x Hsl1(611-950; 1245-1518) |
| 186 | GFY-1997 x GFY-1572 (+pGF-IVL794) | Septin x Hsl1(611-950; 1245-1518) |
| 189 | GFY-1997 x GFY-1571 (+pGF-IVL794) | Septin x Hsl1(611-950; 1245-1518) |
| 188 | GFY-1997 x GFY-1573 (+pGF-IVL794) | Septin x Hsl1(611-950; 1245-1518) |
| 190 | GFY-1997 x GFY-1567 (+pGF-IVL794) | Septin x Hsl1(611-950; 1245-1518) |
|     |                                   |                                   |
| 216 | GFY-1997 x GFY-1846 (+pGF-IVL794) | Septin x Hsl1(611-950; 1245-1518) |
| 217 | GFY-1997 x GFY-1852 (+pGF-IVL794) | Septin x Hsl1(611-950; 1245-1518) |
| 218 | GFY-1997 x GFY-1843 (+pGF-IVL794) | Septin x Hsl1(611-950; 1245-1518) |
| 219 | GFY-1997 x GFY-1849 (+pGF-IVL794) | Septin x Hsl1(611-950; 1245-1518) |
| 220 | GFY-1997 x GFY-1840 (+pGF-IVL794) | Septin x Hsl1(611-950; 1245-1518) |
|     |                                   |                                   |
| 221 | GFY-1997 x GFY-1847 (+pGF-IVL794) | Septin x Hsl1(611-950; 1245-1518) |
| 222 | GFY-1997 x GFY-1853 (+pGF-IVL794) | Septin x Hsl1(611-950; 1245-1518) |
| 223 | GFY-1997 x GFY-1844 (+pGF-IVL794) | Septin x Hsl1(611-950; 1245-1518) |
| 224 | GFY-1997 x GFY-2044 (+pGF-IVL794) | Septin x Hsl1(611-950; 1245-1518) |

|     |                                   |                                   |
|-----|-----------------------------------|-----------------------------------|
| 225 | GFY-1997 x GFY-1841 (+pGF-IVL794) | Septin x Hsl1(611-950; 1245-1518) |
|     |                                   |                                   |
| 262 | GFY-1997 x GFY-1845 (+pGF-IVL794) | Septin x Hsl1(611-950; 1245-1518) |
| 263 | GFY-1997 x GFY-1851 (+pGF-IVL794) | Septin x Hsl1(611-950; 1245-1518) |
| 264 | GFY-1997 x GFY-1842 (+pGF-IVL794) | Septin x Hsl1(611-950; 1245-1518) |
| 265 | GFY-1997 x GFY-1848 (+pGF-IVL794) | Septin x Hsl1(611-950; 1245-1518) |
| 266 | GFY-1997 x GFY-1839 (+pGF-IVL794) | Septin x Hsl1(611-950; 1245-1518) |
|     |                                   |                                   |
| 206 | GFY-1996 x GFY-1846 (+pGF-IVL794) | Septin x Hsl1(611-950; 1245-1518) |
| 207 | GFY-1996 x GFY-1852 (+pGF-IVL794) | Septin x Hsl1(611-950; 1245-1518) |
| 208 | GFY-1996 x GFY-1843 (+pGF-IVL794) | Septin x Hsl1(611-950; 1245-1518) |
| 209 | GFY-1996 x GFY-1849 (+pGF-IVL794) | Septin x Hsl1(611-950; 1245-1518) |
| 210 | GFY-1996 x GFY-1840 (+pGF-IVL794) | Septin x Hsl1(611-950; 1245-1518) |
|     |                                   |                                   |
| 211 | GFY-1996 x GFY-1847 (+pGF-IVL794) | Septin x Hsl1(611-950; 1245-1518) |
| 212 | GFY-1996 x GFY-1853 (+pGF-IVL794) | Septin x Hsl1(611-950; 1245-1518) |
| 213 | GFY-1996 x GFY-1844 (+pGF-IVL794) | Septin x Hsl1(611-950; 1245-1518) |
| 214 | GFY-1996 x GFY-2044 (+pGF-IVL794) | Septin x Hsl1(611-950; 1245-1518) |
| 215 | GFY-1996 x GFY-1841 (+pGF-IVL794) | Septin x Hsl1(611-950; 1245-1518) |
|     |                                   |                                   |
| 252 | GFY-1996 x GFY-1572 (+pGF-IVL794) | Septin x Hsl1(611-950; 1245-1518) |
| 253 | GFY-1996 x GFY-1570 (+pGF-IVL794) | Septin x Hsl1(611-950; 1245-1518) |
| 254 | GFY-1996 x GFY-1573 (+pGF-IVL794) | Septin x Hsl1(611-950; 1245-1518) |
| 255 | GFY-1996 x GFY-1571 (+pGF-IVL794) | Septin x Hsl1(611-950; 1245-1518) |
| 256 | GFY-1996 x GFY-1567 (+pGF-IVL794) | Septin x Hsl1(611-950; 1245-1518) |



|     |                                   |                                   |
|-----|-----------------------------------|-----------------------------------|
|     |                                   |                                   |
| 257 | GFY-1996 x GFY-1845 (+pGF-IVL794) | Septin x Hsl1(611-950; 1245-1518) |
| 258 | GFY-1996 x GFY-1851 (+pGF-IVL794) | Septin x Hsl1(611-950; 1245-1518) |
| 259 | GFY-1996 x GFY-1842 (+pGF-IVL794) | Septin x Hsl1(611-950; 1245-1518) |
| 260 | GFY-1996 x GFY-1848 (+pGF-IVL794) | Septin x Hsl1(611-950; 1245-1518) |
| 261 | GFY-1996 x GFY-1839 (+pGF-IVL794) | Septin x Hsl1(611-950; 1245-1518) |
|     |                                   |                                   |
| 226 | GFY-1998 x GFY-1846 (+pGF-IVL794) | Septin x Hsl1(611-950; 1245-1518) |
| 227 | GFY-1998 x GFY-1852 (+pGF-IVL794) | Septin x Hsl1(611-950; 1245-1518) |
| 228 | GFY-1998 x GFY-1843 (+pGF-IVL794) | Septin x Hsl1(611-950; 1245-1518) |
| 229 | GFY-1998 x GFY-1849 (+pGF-IVL794) | Septin x Hsl1(611-950; 1245-1518) |
| 230 | GFY-1998 x GFY-1840 (+pGF-IVL794) | Septin x Hsl1(611-950; 1245-1518) |
|     |                                   |                                   |
| 231 | GFY-1998 x GFY-1847 (+pGF-IVL794) | Septin x Hsl1(611-950; 1245-1518) |
| 232 | GFY-1998 x GFY-1853 (+pGF-IVL794) | Septin x Hsl1(611-950; 1245-1518) |
| 233 | GFY-1998 x GFY-1844 (+pGF-IVL794) | Septin x Hsl1(611-950; 1245-1518) |
| 234 | GFY-1998 x GFY-2044 (+pGF-IVL794) | Septin x Hsl1(611-950; 1245-1518) |
| 235 | GFY-1998 x GFY-1841 (+pGF-IVL794) | Septin x Hsl1(611-950; 1245-1518) |
|     |                                   |                                   |
| 247 | GFY-1998 x GFY-1845 (+pGF-IVL794) | Septin x Hsl1(611-950; 1245-1518) |
| 248 | GFY-1998 x GFY-1851 (+pGF-IVL794) | Septin x Hsl1(611-950; 1245-1518) |
| 249 | GFY-1998 x GFY-1842 (+pGF-IVL794) | Septin x Hsl1(611-950; 1245-1518) |
| 250 | GFY-1998 x GFY-1848 (+pGF-IVL794) | Septin x Hsl1(611-950; 1245-1518) |
| 251 | GFY-1998 x GFY-1839 (+pGF-IVL794) | Septin x Hsl1(611-950; 1245-1518) |
|     |                                   |                                   |

|                  |                                                 |                                   |
|------------------|-------------------------------------------------|-----------------------------------|
| 267              | GFY-1998 x GFY-1572 (+pGF-IVL794)               | Septin x Hsl1(611-950; 1245-1518) |
| 268              | GFY-1998 x GFY-1570 (+pGF-IVL794)               | Septin x Hsl1(611-950; 1245-1518) |
| 269              | GFY-1998 x GFY-1573 (+pGF-IVL794)               | Septin x Hsl1(611-950; 1245-1518) |
| 270              | GFY-1998 x GFY-1571 (+pGF-IVL794)               | Septin x Hsl1(611-950; 1245-1518) |
| 271              | GFY-1998 x GFY-1567 (+pGF-IVL794)               | Septin x Hsl1(611-950; 1245-1518) |
|                  |                                                 |                                   |
| 287 <sup>3</sup> | GFY-1796 (+pGF-IVL1084) x BY4741 (+pGF-IVL1005) | Septins x Bud4(623-774)           |
| 288              | GFY-1793 (+pGF-IVL1084) x BY4741 (+pGF-IVL1005) | Septins x Bud4(623-774)           |
| 289              | GFY-1795 (+pGF-IVL1084) x BY4741 (+pGF-IVL1005) | Septins x Bud4(623-774)           |
| 290              | GFY-1797 (+pGF-IVL1084) x BY4741 (+pGF-IVL1005) | Septins x Bud4(623-774)           |
| 291              | GFY-1806 (+pGF-IVL1084) x BY4741 (+pGF-IVL1005) | Septins x Bud4(623-774)           |
|                  |                                                 |                                   |
| 292              | GFY-1796 (+pGF-IVL1082) x BY4741 (+pGF-IVL1005) | Septins x Hof1(293-355)           |
| 293              | GFY-1793 (+pGF-IVL1082) x BY4741 (+pGF-IVL1005) | Septins x Hof1(293-355)           |
| 294              | GFY-1795 (+pGF-IVL1082) x BY4741 (+pGF-IVL1005) | Septins x Hof1(293-355)           |
| 295              | GFY-1797 (+pGF-IVL1082) x BY4741 (+pGF-IVL1005) | Septins x Hof1(293-355)           |

|     |                                                 |                         |
|-----|-------------------------------------------------|-------------------------|
| 296 | GFY-1806 (+pGF-IVL1082) x BY4741 (+pGF-IVL1005) | Septins x Hof1(293-355) |
|-----|-------------------------------------------------|-------------------------|

<sup>1</sup>For all diploids, unless otherwise noted, the plasmid expressing GFP $\beta$ 1-9 was transformed into the *MATa* strain prior to mating and diploid selection. Additionally, all haploid strains were selected on medium containing 5-FOA to counter-select for any covering vectors expressing WT copies of the septin gene(s). Unless otherwise noted, yeast were mated on YPD for 24 hours at 30°C and replica-plated to SD-HIS-LEU, grown for 2 days, and transferred to a second SD-HIS-LEU plate and grown for 1-2 additional days.

<sup>2</sup>For clarity, the general category and description of each small grouping of diploid strains is given. In general, one protein fusion is held constant and compared against the remaining set of five tagged septins. The portion held constant in each grouping is briefly described (e.g. Cdc10- $\beta$ 11).

<sup>3</sup>Diploids strains expressing fragments of either Bud4 or Hof1 (expressed from plasmids) used a modified diploid selection procedure. Prior to transformation of the GFP $\beta$ 1-9 plasmid or Bud4/Hof1-expressing plasmids, the septin covering vector was counter-selected on 5-FOA medium twice. Following mating, diploids were selected on SD-URA-LEU medium twice.

Table S4. Protein abundance for split GFP negative control proteins present in the cytosol

| <b>Protein</b> | <b>Description</b>         | <b>Molecules / cell</b> | <b>Reference</b>           |
|----------------|----------------------------|-------------------------|----------------------------|
| Pgk1           | 3-phosphoglycerate kinase  | 314,000                 | (Ghaemmaghmi et al., 2003) |
|                |                            | 15,100                  | (Chong et al., 2015)       |
|                |                            | 561,265                 | (Kulak et al., 2014)       |
|                |                            | 42,840                  | (Newman et al., 2006)      |
| Hsp82          | Hsp90 protein chaperone    | 445,000                 | (Ghaemmaghmi et al., 2003) |
|                |                            | 4,167                   | (Chong et al., 2015)       |
|                |                            | 10,044                  | (Kulak et al., 2014)       |
|                |                            | 6,395                   | (Newman et al., 2006)      |
| Gpp1           | Glycerol-1-phosphatase     | 193,000                 | (Ghaemmaghmi et al., 2003) |
|                |                            | 14,626                  | (Chong et al., 2015)       |
|                |                            | 235,727                 | (Kulak et al., 2014)       |
|                |                            | 9,107                   | (Newman et al., 2006)      |
| Tpi1           | Triose phosphate isomerase | 207,000                 | (Ghaemmaghmi et al., 2003) |
|                |                            | 5,770                   | (Chong et al., 2015)       |
|                |                            | 395,237                 | (Kulak et al., 2014)       |
|                |                            | 4,768                   | (Newman et al., 2006)      |
| Cdc19          | Pyruvate kinase            | 291,000                 | (Ghaemmaghmi et al., 2003) |
|                |                            | 404,162                 | (Kulak et al., 2014)       |
|                |                            | 11,387                  | (Newman et al., 2006)      |
| Cdc11          | Septin subunit             | 9280                    | (Ghaemmaghmi et al., 2003) |
|                |                            | 236                     | (Chong et al., 2015)       |
|                |                            | 3947                    | (Kulak et al., 2014)       |
|                |                            | 359                     | (Newman et al., 2006)      |

## SUPPLEMENTAL LITERATURE CITED

- Brachmann, C.B., Davies, A., Cost, G.J., Caputo, E., Li, J., Hieter, P., and Boeke, J.D. (1998). Designer deletion strains derived from *Saccharomyces cerevisiae* S288C: a useful set of strains and plasmids for PCR-mediated gene disruption and other applications. *Yeast* **14**, 115-132.
- Cabantous, S., Nguyen, H.B., Pedelacq, J.D., Korachi, F., Chaudhary, A., Ganguly, K., Lockard, M.A., Favre, G., Terwilliger, T.C., and Waldo, G.S. (2013). A new protein-protein interaction sensor based on tripartite split-GFP association. *Sci Rep* **3**, 2854.1-2854.9.
- Chong, Y.T., Koh, J.L., Friesen, H., Duffy, S.K., Cox, M.J., Moses, A., Moffat, J., Boone, C., and Andrews, B.J. (2015). Yeast proteome dynamics from single cell imaging and automated analysis. *Cell* **161**, 1413-1424.
- Ghaemmghami, S., Huh, W.K., Bower, K., Howson, R.W., Belle, A., Dephoure, N., O'Shea, E.K., and Weissman, J.S. (2003). Global analysis of protein expression in yeast. *Nature* **425**, 737-741.
- Kulak, N.A., Pichler, G., Paron, I., Nagaraj, N., and Mann, M. (2014). Minimal, encapsulated proteomic-sample processing applied to copy-number estimation in eukaryotic cells. *Nat Methods* **11**, 319-324.
- Newman, J.R., Ghaemmghami, S., Ihmels, J., Breslow, D.K., Noble, M., DeRisi, J.L., and Weissman, J.S. (2006). Single-cell proteomic analysis of *S. cerevisiae* reveals the architecture of biological noise. *Nature* **441**, 840-846.
- Sikorski, R.S., and Hieter, P. (1989). A system of shuttle vectors and yeast host strains designed for efficient manipulation of DNA in *Saccharomyces cerevisiae*. *Genetics* **122**, 19-27.
- Sirajuddin, M., Farkasovsky, M., Hauer, F., Kühlmann, D., Macara, I.G., Weyand, M., Stark, H., Wittinghofer, A. (2007) Structural insight into filament formation by mammalian septins. *Nature* **449**, 311-315.
